# Supplementary material for: Gallium and indium complexes with new hexadentate bis(semicarbazone) and bis(thiosemicarbazone) chelators
Source: Royal Society of Chemistry journal article supplement (doi:10.1039/d0dt04028b), 2021-01-01
Supplement: d0dt04028b1.pdf [file d0dt04028b1.pdf]

## Supporting Information

# Gallium and indium complexes with new hexadentate bis(semicarbazone) and bis(thiosemicarbazone) chelators

Viviana S. Prado,<sup>a</sup> Renan C. F. Leitaó,<sup>a</sup> Francisco Silva,<sup>b</sup> Lurdes Gano<sup>b</sup>, Isabel C. Santos,<sup>b</sup> Fabio

L. N. Marques <sup>c</sup>, António Paulo<sup>b</sup> and Victor M. Deflon<sup>a\*</sup>

<sup>a</sup>Instituto de Química de São Carlos, Universidade de São Paulo, CEP 13566-590 São Carlos, SP, Brazil.

<sup>b</sup>Centro de Ciências e Tecnologias Nucleares, Instituto Superior Técnico, Universidade de Lisboa, Estrada Nacional 10, 2695-066 Bobadela LRS, Portugal.

<sup>c</sup>Laboratório de Medicina Nuclear (LIM-43), Departamento de Radiologia e Oncologia, Faculdade de Medicina, Universidade de São Paulo, CEP 05403-911 Sao Paulo, SP, Brazil.

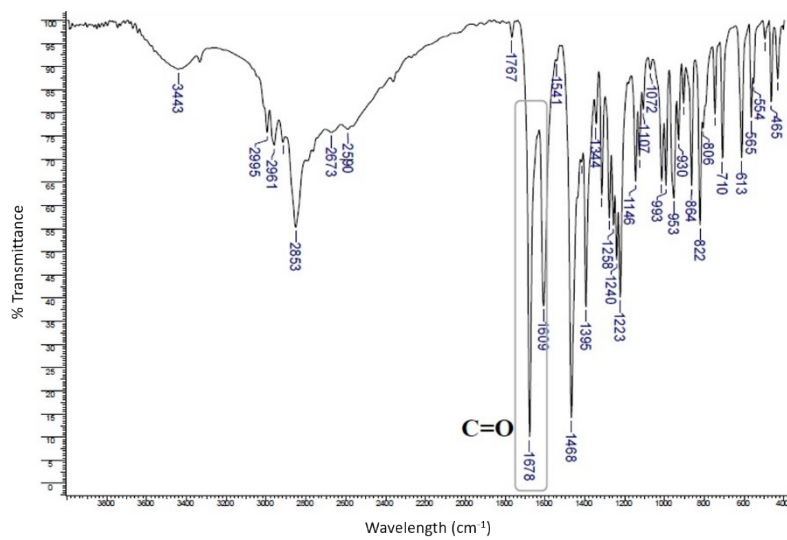

Fig. S1 IR spectrum of hfma.

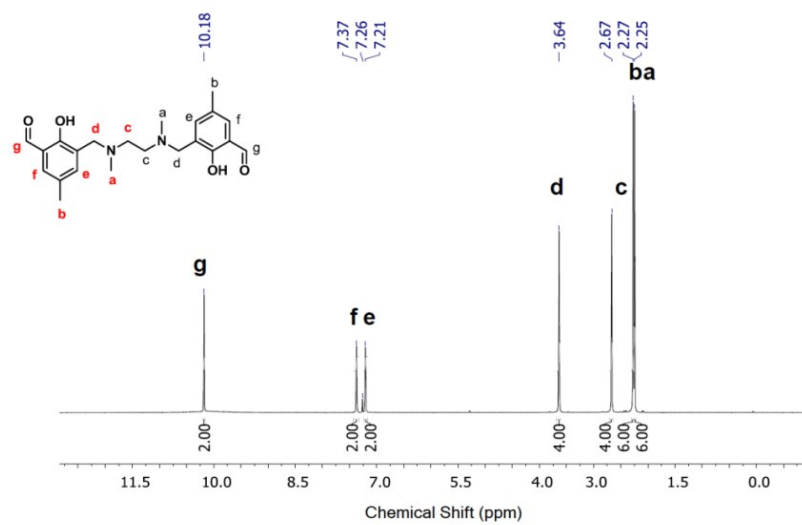

Fig. S2 <sup>1</sup>H spectrum of hfma in CDCl<sub>3</sub>.

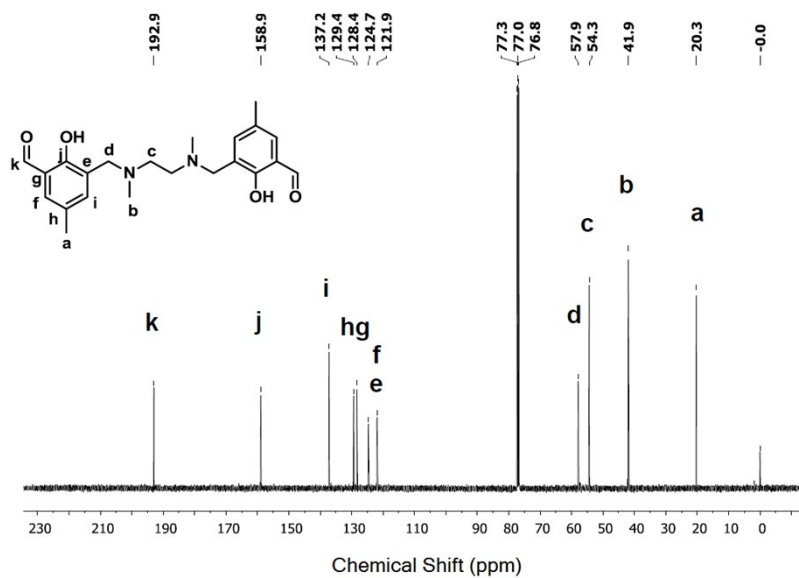

Fig. S3 <sup>13</sup>C spectrum of hfma in CDCl<sub>3</sub>.

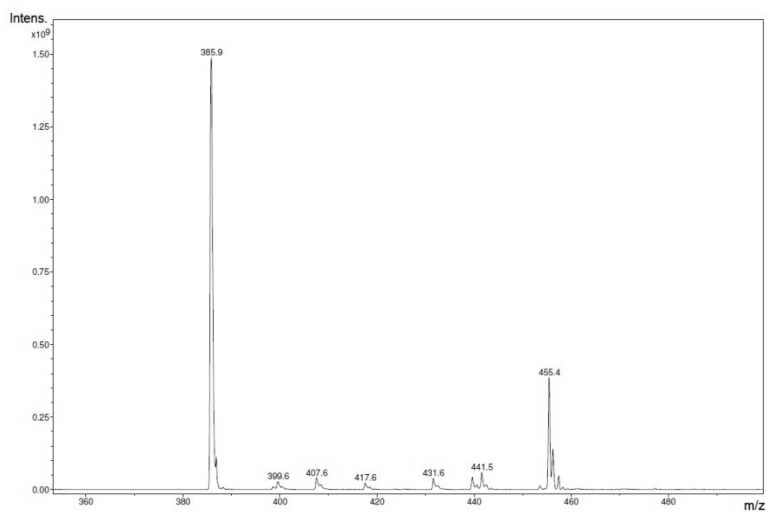

Fig. S4 LR-ESI(+)-MS spectrum of hfma.

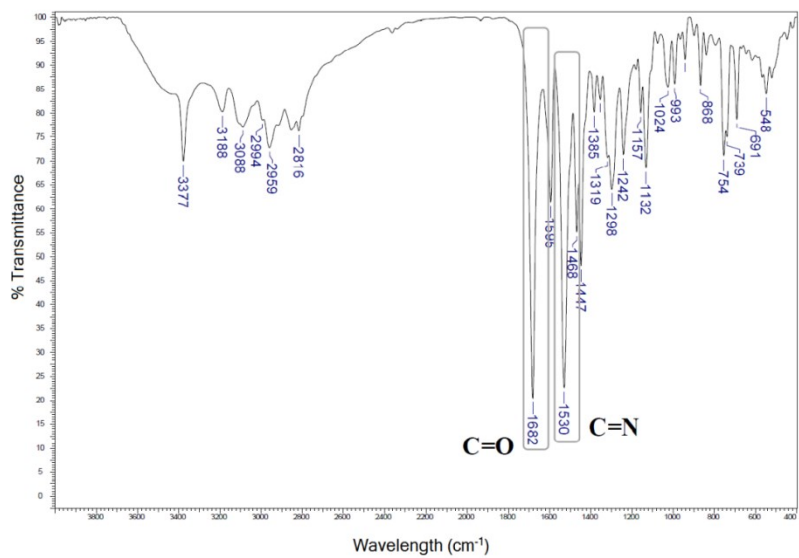

Fig. S5 IR spectrum of H<sub>4</sub>bsc.

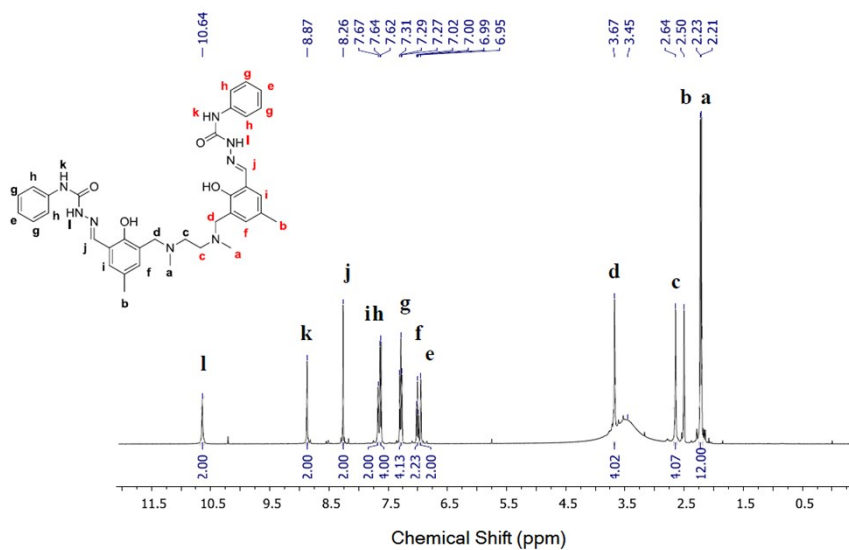

Fig. S6 <sup>1</sup>H spectrum of H<sub>4</sub>bsc in DMSO-d<sub>6</sub>.

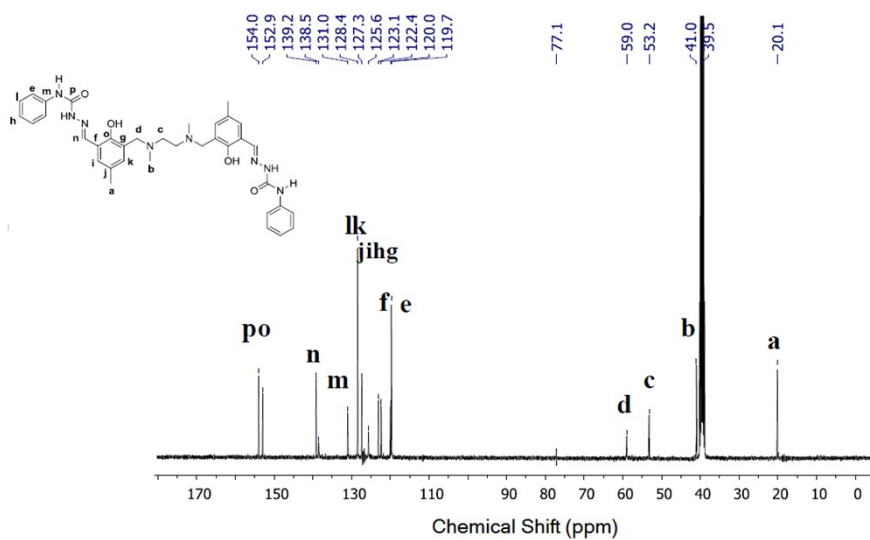

Fig. S7 <sup>13</sup>C spectrum of **H<sub>4</sub>bsc** in DMSO-*d*<sub>6</sub>.

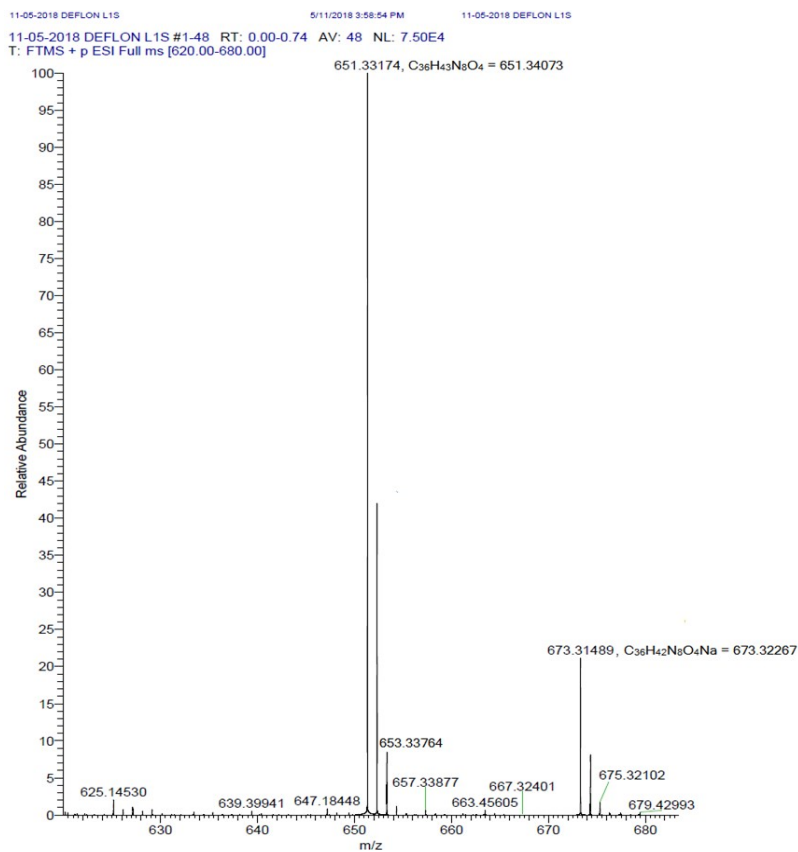

Fig. S8 HR-ESI(+)-MS spectrum of **H<sub>4</sub>bsc**.

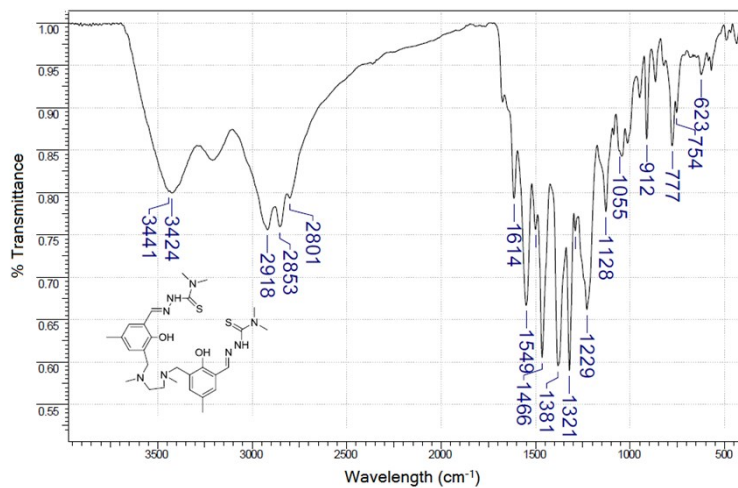

Fig. S9 IR spectrum of **H<sub>4</sub>btsc**.

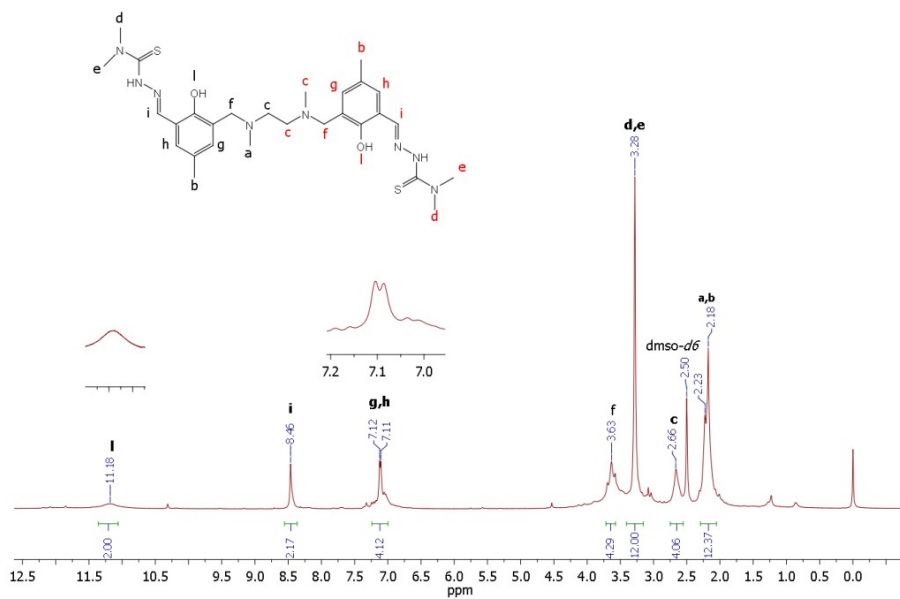

Fig. S10 <sup>1</sup>H spectrum of **H<sub>4</sub>btsc** in DMSO-*d*<sub>6</sub>.

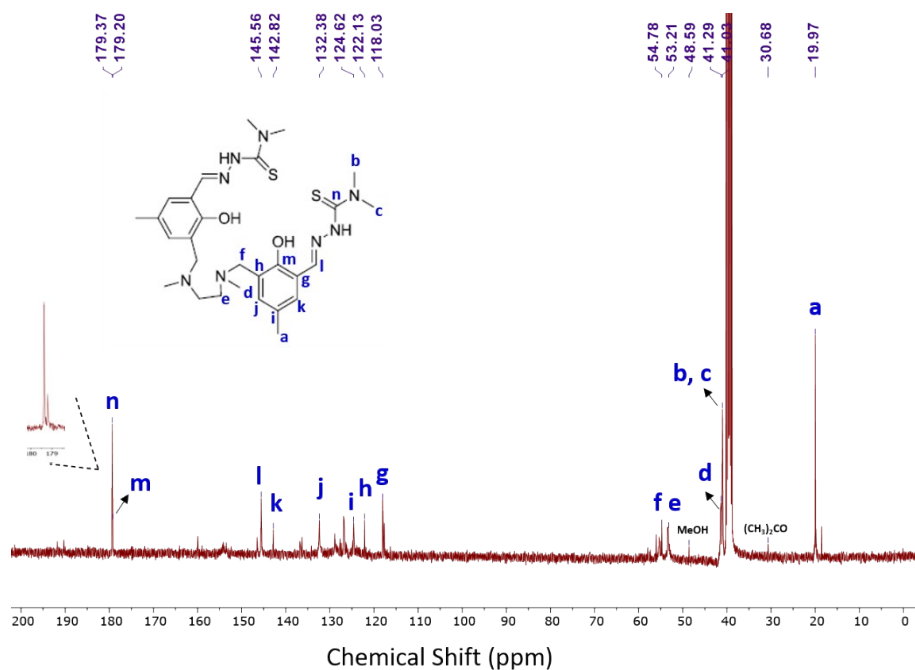

Fig. S11  $^{13}\text{C}$  spectrum of  $\text{H}_4\text{btsc}$  in  $\text{DMSO-}d_6$ .

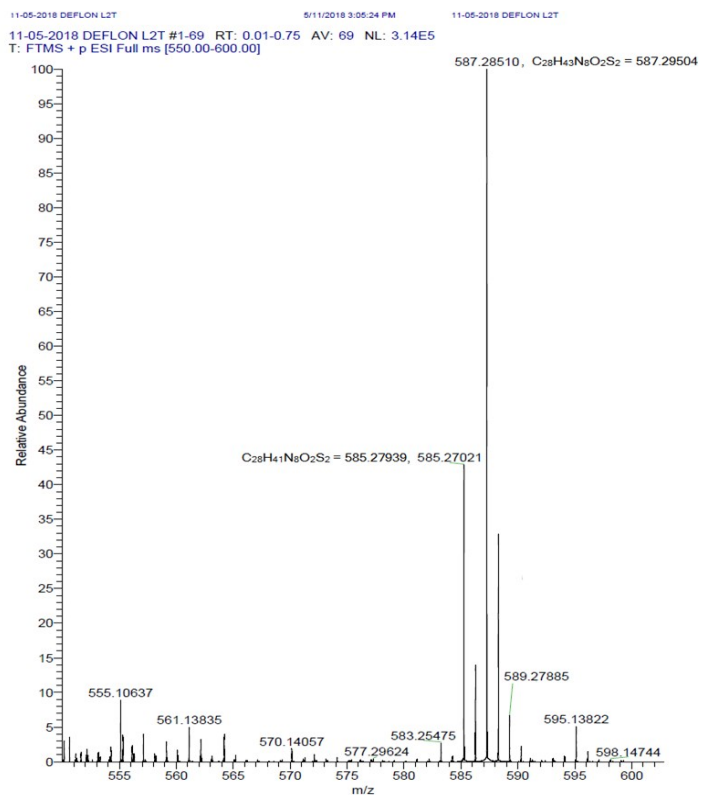

Fig. S12 HR-ESI(+)-MS spectrum of  $\text{H}_4\text{btsc}$ .

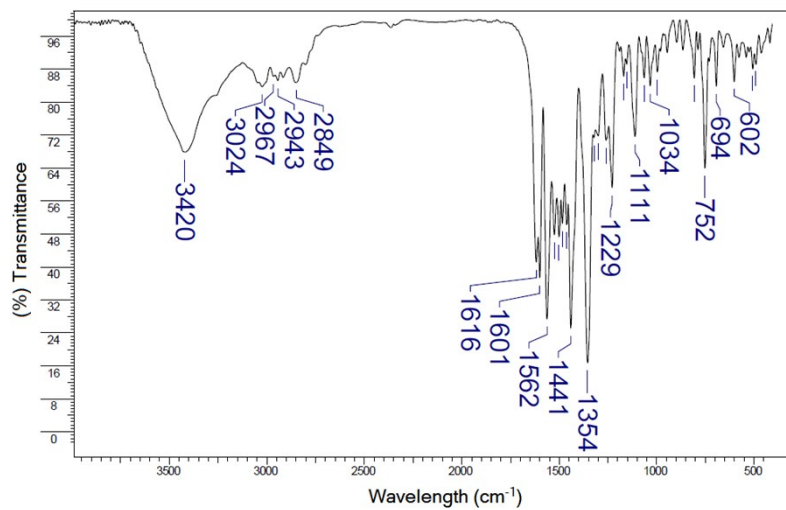

Fig. S13 IR spectrum of complex 1.

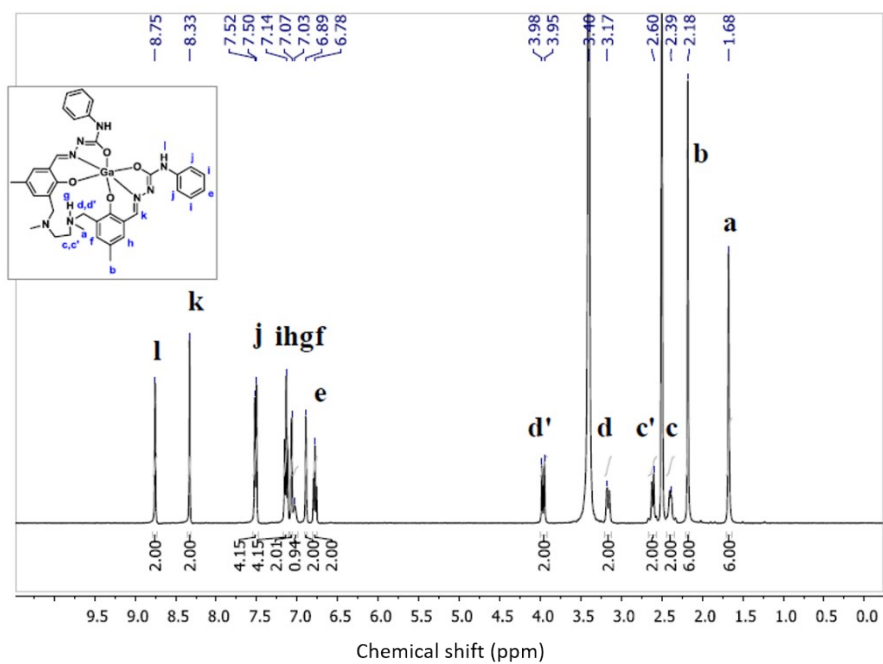

Fig. S14 <sup>1</sup>H spectrum of complex 1 in DMSO-d<sub>6</sub>.



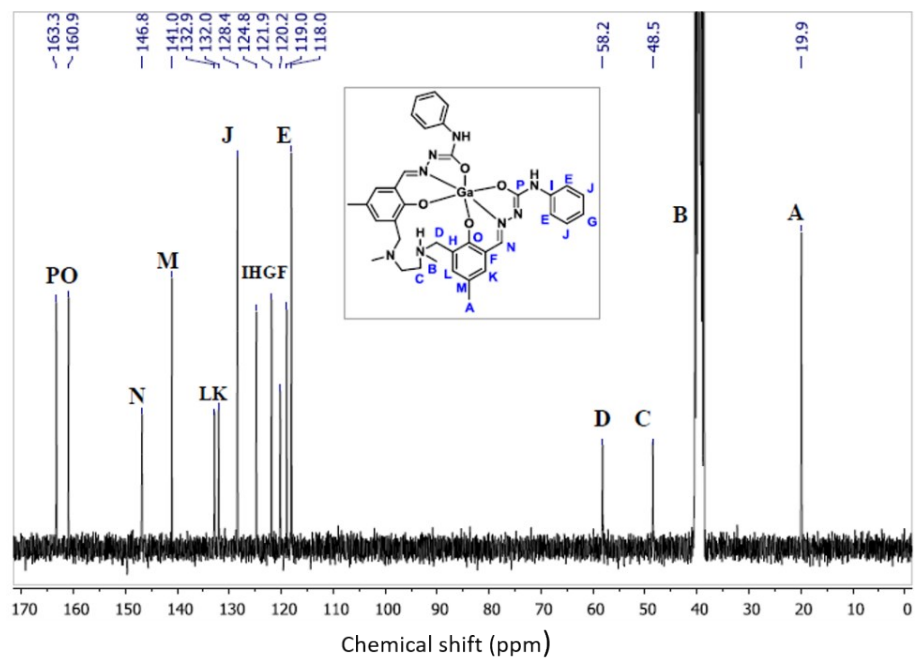

Fig. S15  $^{13}\text{C}$  spectrum of complex **1** in  $\text{DMSO-}d_6$ .

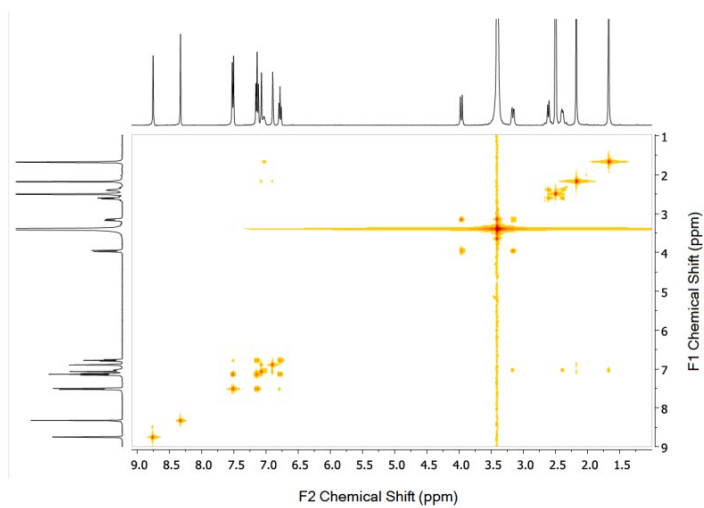

Fig. S16 COSY spectrum of complex **1** in  $\text{DMSO-}d_6$ .

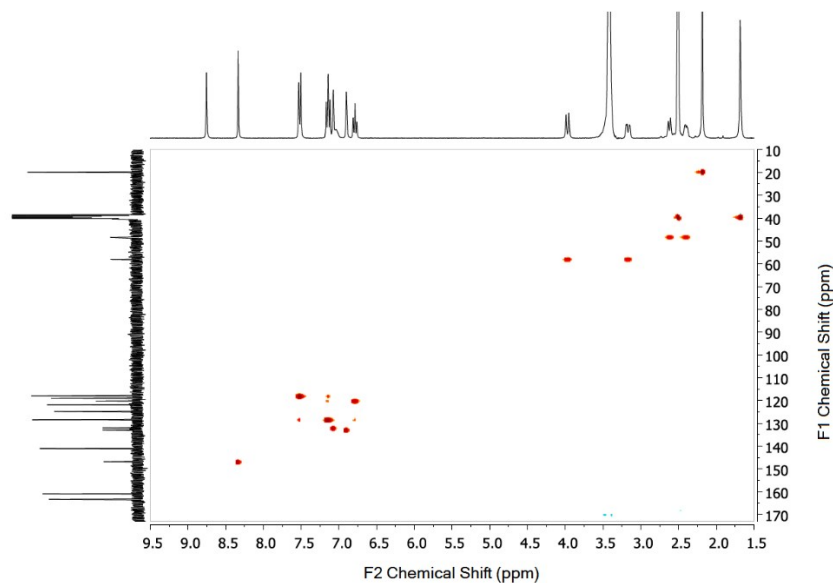

Fig. S17 HSQC spectrum of complex **1** in DMSO-*d*<sub>6</sub>.

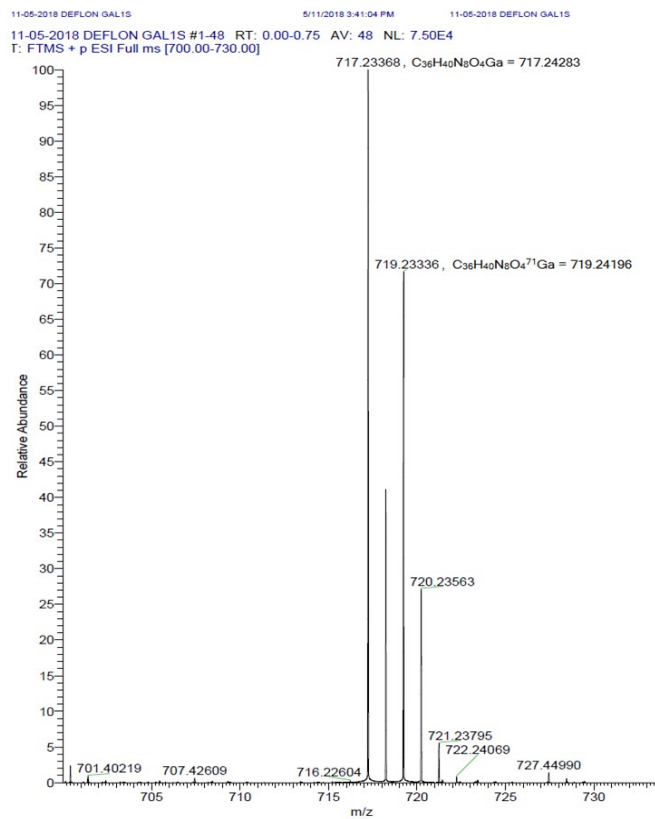

Fig. S18 HR-ESI(+)-MS spectrum of complex **1**.



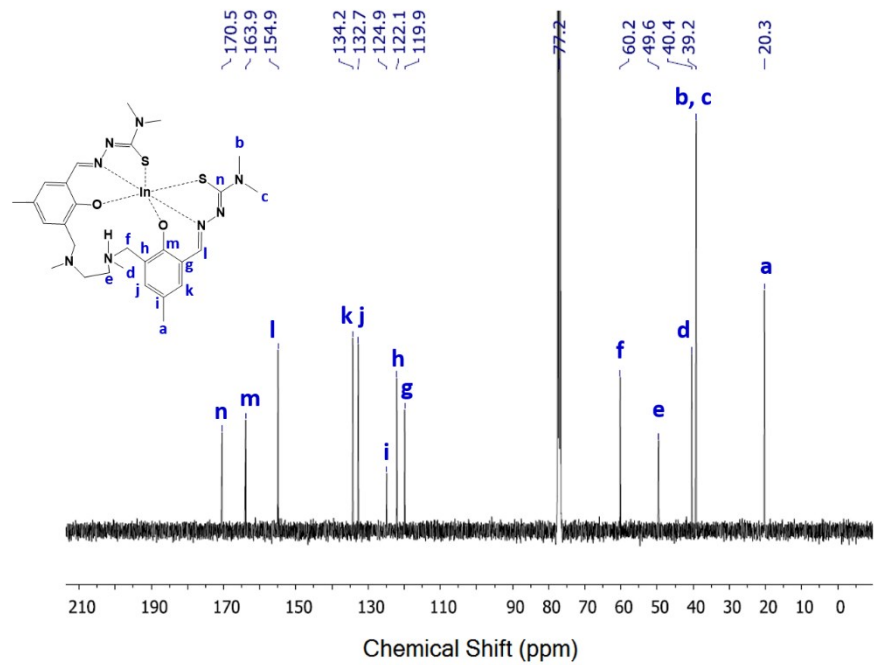

Fig. S21  $^{13}\text{C}$  spectrum of complex **2** in  $\text{CDCl}_3$ .

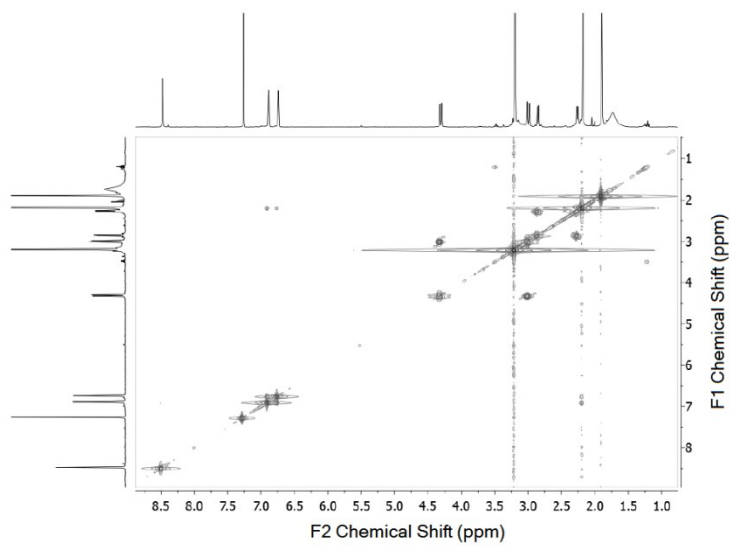

Fig. S22 COSY spectrum of complex **2** in  $\text{DMSO-}d_6$ .

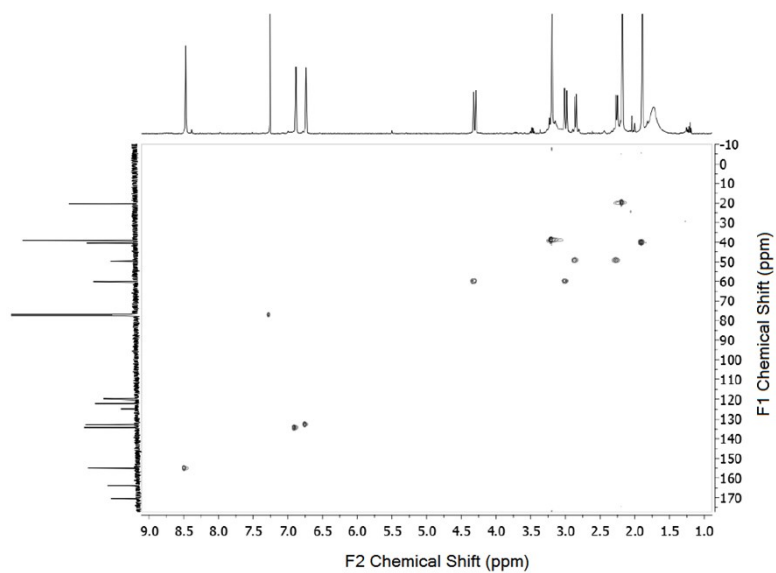

Fig. S23 HSQC spectrum of complex 2 in DMSO-*d*<sub>6</sub>.

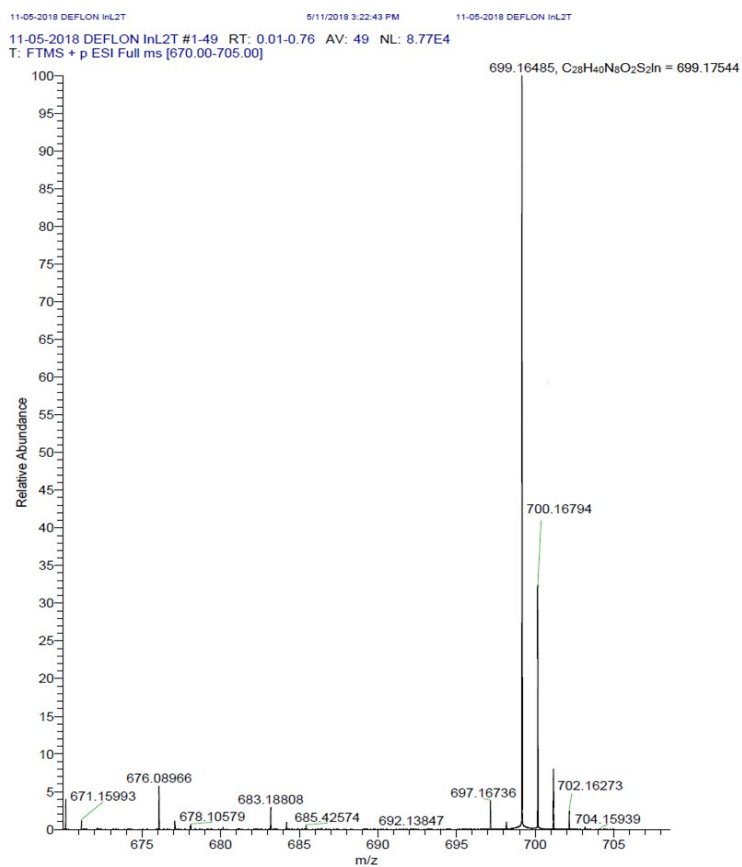

Fig. S24 HR-ESI(+)-MS spectrum of complex 1.

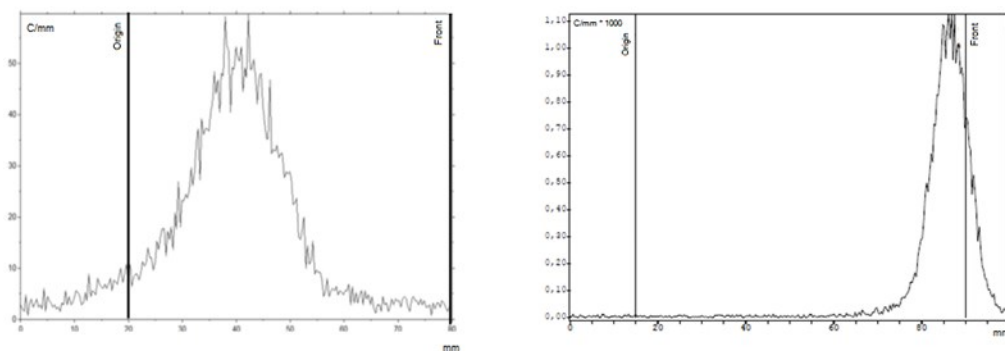

**Fig. S25** Radiochromatograms of [ $^{67}\text{Ga}(\text{Hbsc})$ ] (**1\***) ( $R_f = 0.33$ ) (left) and [ $^{111}\text{In}(\text{Hbtsc})$ ] (**2\***) ( $R_f = 0.94$ ) (right), using ITLC-SG plates. Eluents: 0.5M AcOH in MeOH for **1\*** and MeOH/ 6M HCl (95:5) for **2\***.

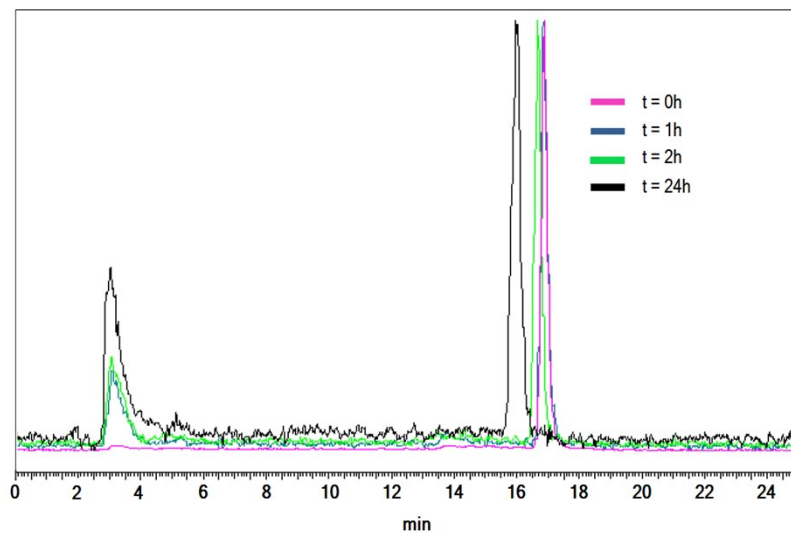

**Fig. S26** HPLC chromatograms of **1\*** in PBS buffer (pH 7.2) after  $t = 0, 1, 2$  and 24h of incubation at  $37^\circ\text{C}$ .

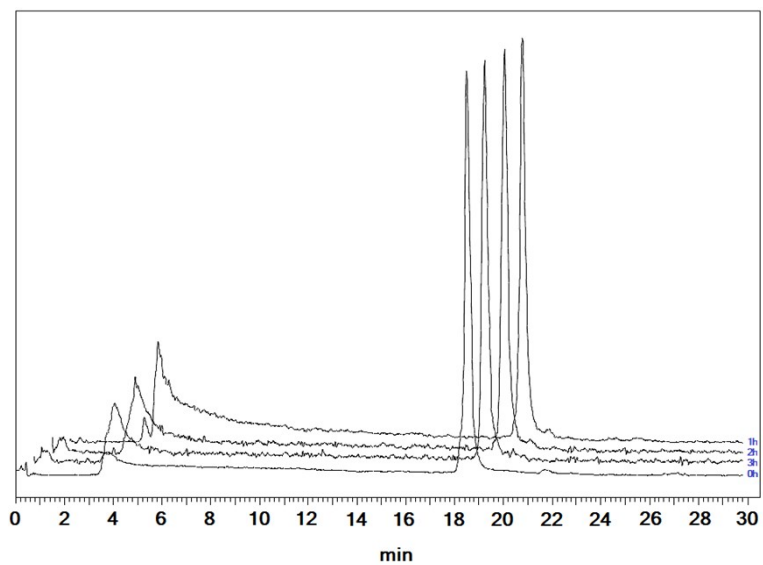

**Fig. S27** HPLC chromatograms of **2\*** in PBS buffer (pH 7.2) after t = 0, 1, 2 and 3h of incubation at 37°C.

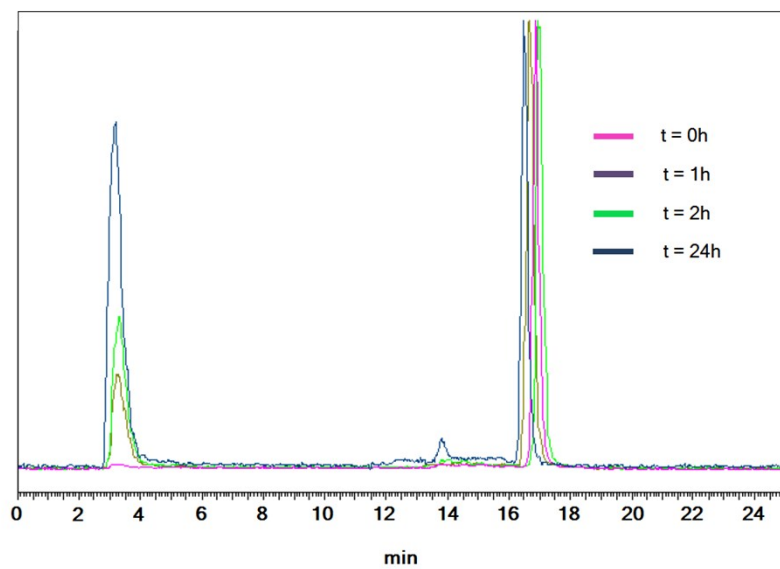

**Fig. S28** HPLC chromatograms of **1\*** in *apo*-transferrin after t = 0, 1, 2 and 24h of incubation at 37°C.

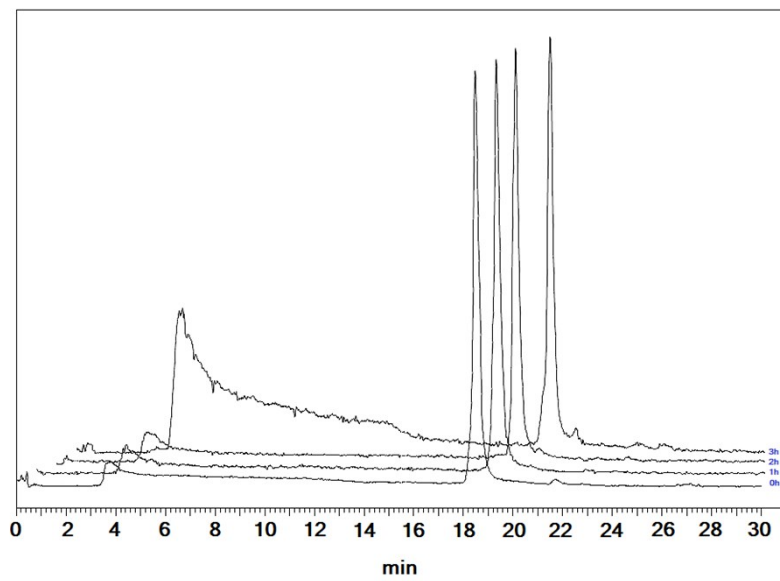

**Fig. S29** HPLC chromatograms of **2\*** in *apo*-transferrin after  $t = 0, 1, 2$  and  $3\text{h}$  of incubation at  $37^\circ\text{C}$ .

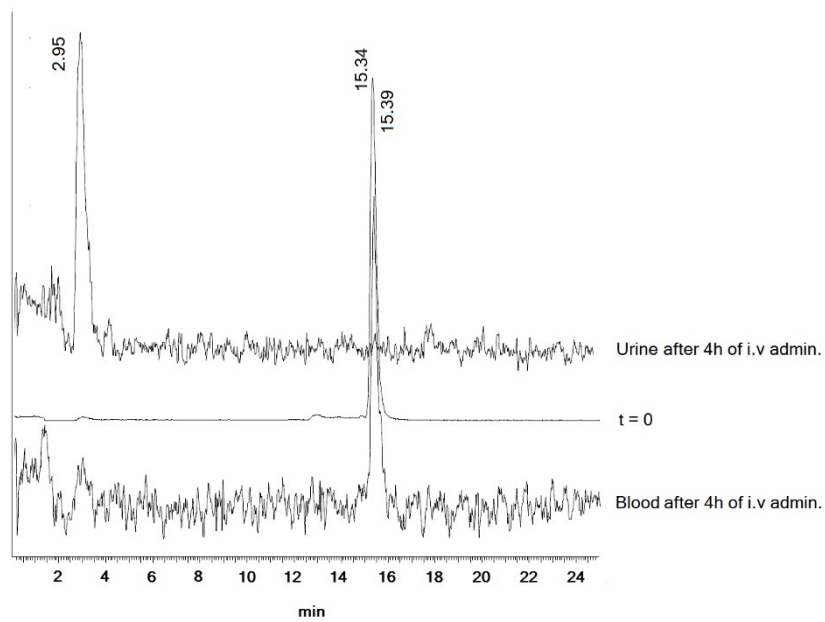

**Fig. S30** HPLC chromatograms of urine and blood from CD-1 mice injected with **1\*** complex ( $t = 0$  correspond to **1\*** after radiolabeling).



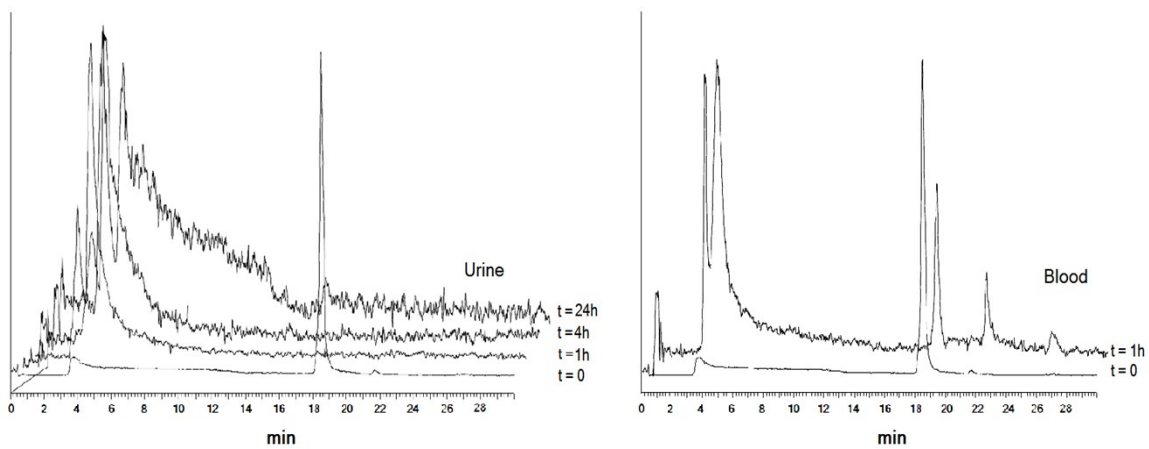

**Fig. S31** HPLC chromatograms of urine and blood from CD-1 mice injected with **2\*** complex (t = 0 correspond to **2\*** after radiolabeling).

**Table S1** Crystallographic data for complexes **1** and **2**.

|                                               | [Ga(Hbse)]·CH <sub>3</sub> OH ( <b>1</b> ·CH <sub>3</sub> OH)   | [In(Hbtsc)]·CH <sub>3</sub> OH ( <b>2</b> ·CH <sub>3</sub> OH)                 |
|-----------------------------------------------|-----------------------------------------------------------------|--------------------------------------------------------------------------------|
| Empirical formula                             | C <sub>37</sub> H <sub>43</sub> GaN <sub>8</sub> O <sub>5</sub> | C <sub>29</sub> H <sub>43</sub> InN <sub>8</sub> O <sub>3</sub> S <sub>2</sub> |
| Formula weight                                | 749.51                                                          | 730.65                                                                         |
| Crystal system                                | Monoclinic                                                      | Monoclinic                                                                     |
| Space group                                   | C2/c                                                            | P2 <sub>1</sub> /c                                                             |
| a (Å)                                         | 19.7797(12)                                                     | 9.9982(2)                                                                      |
| b (Å)                                         | 10.8099(6)                                                      | 14.1528(4)                                                                     |
| c (Å)                                         | 18.3616(11)                                                     | 26.1451(7)                                                                     |
| α (°)                                         | 90                                                              | 90                                                                             |
| β (°)                                         | 111.076(3)                                                      | 95.532(2)                                                                      |
| γ (°)                                         | 90                                                              | 90                                                                             |
| V (Å <sup>3</sup> )                           | 3663.4(4)                                                       | 3682.37(16)                                                                    |
| Z                                             | 4                                                               | 4                                                                              |
| Density (calculated) Mg m <sup>3</sup>        | 1.359                                                           | 1.318                                                                          |
| Absorption coefficient, μ (mm <sup>-1</sup> ) | 0.805                                                           | 0.794                                                                          |
| θ range (deg.)                                | 2.183-25.080                                                    | 2.754-25.680                                                                   |
| Index ranges                                  | -21 ≤ h ≤ 23, -12 ≤ k ≤ 12, -21 ≤ l ≤ 20                        | -12 ≤ h ≤ 12, -17 ≤ k ≤ 17, -31 ≤ l ≤ 28                                       |
| Reflections collected                         | 16269                                                           | 26949                                                                          |
| Independent reflections                       | 3260 / R <sub>int</sub> = 0.0336                                | 6855/R <sub>int</sub> = 0.0541                                                 |
| Data/restraints/parameters                    | 3260/1/250                                                      | 6855/0/402                                                                     |
| Absorption correction                         | Semi-empirical / multi-scan                                     | Semi-empirical / multi-scan                                                    |
| Max. and min. transmission                    | 0.938/0.849                                                     | 0.9843/0.7419                                                                  |
| R <sub>1</sub> [ <i>I</i> > 2σ( <i>I</i> )]   | 0.0447                                                          | 0.0435                                                                         |
| wR <sub>2</sub> [ <i>I</i> > 2σ( <i>I</i> )]  | 0.1157                                                          | 0.1019                                                                         |
| Goodness-of-fit on F <sup>2</sup> , S         | 1.048                                                           | 1.041                                                                          |

**Table S2** Short contacts list of compounds [Ga(Hbsc)]·CH<sub>3</sub>OH (**1**·CH<sub>3</sub>OH) and In(Hbtsc)]·CH<sub>3</sub>OH (**2**·CH<sub>3</sub>OH)

| <b>[Ga(Hbsc)]·CH<sub>3</sub>OH</b> |              |                                     |                  |
|------------------------------------|--------------|-------------------------------------|------------------|
| <b>Short contacts</b>              | <b>D (Å)</b> | <b>D--<math>\Sigma</math>VdW(Å)</b> | <b>Sym. oper</b> |
| Complex...Solvent                  |              |                                     |                  |
| N1...C19                           | 3.008(6)     | -0.242                              | x,y,z            |
| N1...H19C                          | 2.590        | -0.160                              | x,y,z            |
| C2... H19C                         | 2.796        | -0.104                              | x,y,z            |
| H1...O3                            | 2.197        | -0.523                              | x,y,z            |
| H1...H3A                           | 2.260        | -0.140                              | x,y,z            |
| H1...C19                           | 2.093        | -0.807                              | x,y,z            |
| H1...H19A                          | 2.051        | -0.349                              | x,y,z            |
| H1...H19C                          | 1.839        | -0.561                              | x,y,z            |
| C7...C19                           | 3.175(8)     | -0.225                              | x,y,z            |
| C7...H19C                          | 2.272        | -0.628                              | x,y,z            |
| H7...C19                           | 2.440        | -0.460                              | x,y,z            |
| H7...H19C                          | 1.594        | -0.806                              | x,y,z            |
| C12...C19                          | 3.245(8)     | -0.155                              | -1/2+x,-1/2+y, z |
| C13...C19                          | 3.315(8)     | -0.085                              | -1/2+x,-1/2+y, z |
| C13...H19B                         | 2.752        | -0.148                              | -1/2+x,-1/2+y, z |
| N2...O3                            | 2.873(9)     | -0.197                              | 1.5-x,-1/2-y,1-z |
| N2...C19                           | 2.839(6)     | -0.223                              | 1.5-x,-1/2-y,1-z |
| N2...H19B                          | 2.189        | -0.561                              | 1.5-x,-1/2-y,1-z |
| C8...H19B                          | 2.709        | -0.191                              | 1.5-x,-1/2-y,1-z |
| H8...H19B                          | 2.049        | -0.351                              | 1.5-x,-1/2-y,1-z |
| Complex... Complex                 |              |                                     |                  |

|                                     |              |                   |                   |
|-------------------------------------|--------------|-------------------|-------------------|
| C1...H6                             | 2.756        | -0.142            | 1/2-x,1/2+y,1/2-z |
| C5...H16A                           | 2.849        | -0.051            | 1/2-x,1/2+y,1/2-z |
| C6...H16A                           | 2.731        | -0.169            | 1/2-x,1/2+y,1/2-z |
| C8...C14                            | 3.353        | -0.047            | 1-x, -y,-z        |
| N2...H15C                           | 2.631        | -0.119            | 1-x,- y,-z        |
| <b>[In(Hbtsc)]·CH<sub>3</sub>OH</b> |              |                   |                   |
| <b>Short contacts</b>               | <b>D (Å)</b> | <b>D--ΣVdW(Å)</b> | <b>Sym. oper</b>  |
| Complex...Solvent                   |              |                   |                   |
| N2...O3S                            | 2.923        | -0.157            | x,y,z             |
| N2...H3S                            | 2.094        | -0.656            | x,y,z             |
| Complex...Complex                   |              |                   |                   |
| N2...H23C                           | 2.738        | -0.012            | -x,-y,1-z         |
| S1... H10A                          | 2.879        | -0.121            | 1+x,y,z           |
| C5...H21A                           | 2.847        | -0.053            | -1+x,y,z          |
| C9 ... H27C                         | 2.873        | -0.027            | -1+x,y,z          |
| H9B...H27C                          | 2.299        | -0.101            | -1+x,y,z          |
| C13 ... H9A                         | 2.810        | -0.090            | -x,1/2+y,1/2-z    |
| C14 ...H9A                          | 2.719        | -0.181            | -x,1/2+y,1/2-z    |
| C20 ...H11A                         | 2.856        | -0.044            | -x,1/2+y,1/2-z    |
| C22 ...H28C                         | 2.812        | -0.088            | 1-x,-y,1-z        |
| H27B ...H10B                        | 2.320        | -0.080            | -x,-1/2+y,1/2-z   |
| C27 ... C18                         | 3.327(7)     | -0.073            | 1-x,-1/2+y,1/2-z  |
| H27C ... C18                        | 2.801        | -0.099            | 1-x,-1/2+y,1/2-z  |
| C26 ... H4                          | 2.846        | -0.054            | x,1/2-y,-1/2+z    |

**Table S3** Biodistribution results of complexes **1\*** and **2\*** in female CD-1 mice showing organ and tissue uptake and overall excretion at 1, 4 and 24 h after i.v. administration. Biodistribution is expressed as percentage of injected dose per gram (% IA g<sup>-1</sup>).

| Organ             | % IA g <sup>-1</sup> |             |             |             |             |             |
|-------------------|----------------------|-------------|-------------|-------------|-------------|-------------|
|                   | 1h                   |             | 4h          |             | 24h         |             |
|                   | 1*                   | 2*          | 1*          | 2*          | 1*          | 2*          |
| Blood             | 18.7 ± 2.1           | 2.9 ± 0.4   | 8.8 ± 0.4   | 1.0 ± 0.1   | 1.7 ± 0.2   | 0.6 ± 0.1   |
| Liver             | 23.3 ± 4.2           | 35.3 ± 0.7  | 21 ± 4.2    | 32.0 ± 3.5  | 11.3 ± 2.7  | 29.3 ± 0.7  |
| Intestine         | 21.8 ± 5.5           | 29.4 ± 2.4  | 31.1 ± 4.9  | 21.1 ± 8.9  | 5 ± 1       | 4.0 ± 0.5   |
| Spleen            | 0.69 ± 0.07          | 2.0 ± 0.4   | 0.67 ± 0.08 | 3.0 ± 1     | 0.33 ± 0.03 | 2.3 ± 0.2   |
| Heart             | 0.7 ± 0.1            | 0.4 ± 0.2   | 0.6 ± 0.2   | 0.20 ± 0.05 | 0.19 ± 0.03 | 0.2 ± 0.02  |
| Lung              | 2.2 ± 0.4            | 1.5 ± 0.1   | 0.9 ± 0.1   | 1.1 ± 0.2   | 0.4 ± 0.2   | 0.8 ± 0.3   |
| Kidney            | 2.1 ± 0.4            | 3.6 ± 0.6   | 1.3 ± 0.1   | 2.7 ± 0.5   | 0.8 ± 0.2   | 2.6 ± 0.1   |
| Muscle            | 9.8 ± 1.7            | 7.1 ± 0.2   | 11.3 ± 2.5  | 5.0 ± 1.1   | 6.9 ± 1.5   | 4.5 ± 0.8   |
| Bone              | 4.6 ± 0.5            | 3.2 ± 0.4   | 4.6 ± 0.3   | 3.3 ± 0.6   | 3.5 ± 0.9   | 3.7 ± 1.3   |
| Stomach           | 1.4 ± 0.4            | 1.1 ± 0.2   | 0.9 ± 0.4   | 0.34 ± 0.06 | 0.6 ± 0.2   | 0.32 ± 0.05 |
| Pancreas          | 0.36 ± 0.03          | 0.37 ± 0.04 | 0.29 ± 0.03 | 0.28 ± 0.05 | 0.22 ± 0.05 | 0.36 ± 0.01 |
| Brain             | 0.19 ± 0.07          | 0.02 ± 0.00 | 0.09 ± 0.02 | 0.02 ± 0.00 | 0.02 ± 0    | 0.01 ± 0.00 |
| Excretion (% I.D) | 3.0 ± 0.9            | 2.0 ± 0.5   | 8.5 ± 6.0   | 17.9 ± 7.7  | 57.4 ± 2.7  | 37.1 ± 4.4  |
